# Supplementary material
Source: publisher figshare collection journal article supplement (https://acs.figshare.com/ndownloader/files/23198471)
Supplement: Supplementary file 1 [file 23198471]

## Supporting Information

# Racemic Conglomerate Formation via Crystallization of Metaxalone from Volatile Deep Eutectic Solvents

*Victoria Hamilton,<sup>†</sup> Iryna Andrusenko,<sup>§</sup> Jason Potticary,<sup>†</sup> Charlie Hall,<sup>†</sup> Richard Stenner,<sup>‡</sup>  
Enrico Mugnaioli,<sup>§</sup> Arianna E. Lanza,<sup>§</sup> Mauro Gemmi,<sup>§,\*</sup> Simon R. Hall<sup>†,\*</sup>*

<sup>†</sup>School of Chemistry, University of Bristol, Bristol, Cantock's Close, BS8 1TS, UK

<sup>§</sup>Center for Nanotechnology Innovation@NEST, Istituto Italiano di Tecnologia, Piazza San  
Silvestro 12, Pisa, Italy

<sup>‡</sup>Biomedical Sciences, University of Bristol, Tankard's Close, University Walk, BS8 1TD,  
UK

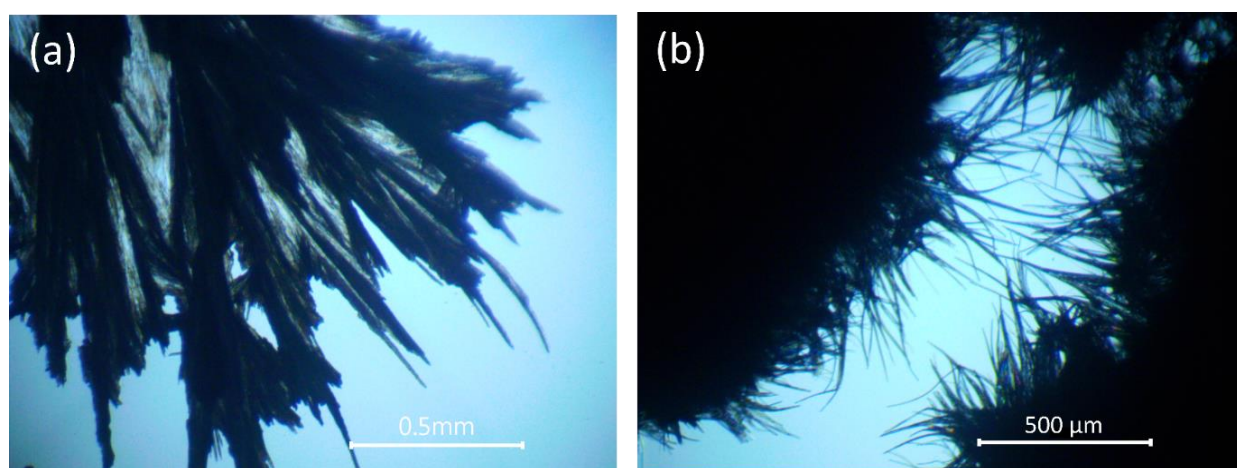

**Figure S1.** Unfiltered light microscopy images of the crystals shown in Figure 3 of (a) Form A-R/S and (b) Form A-rac metaxalone.

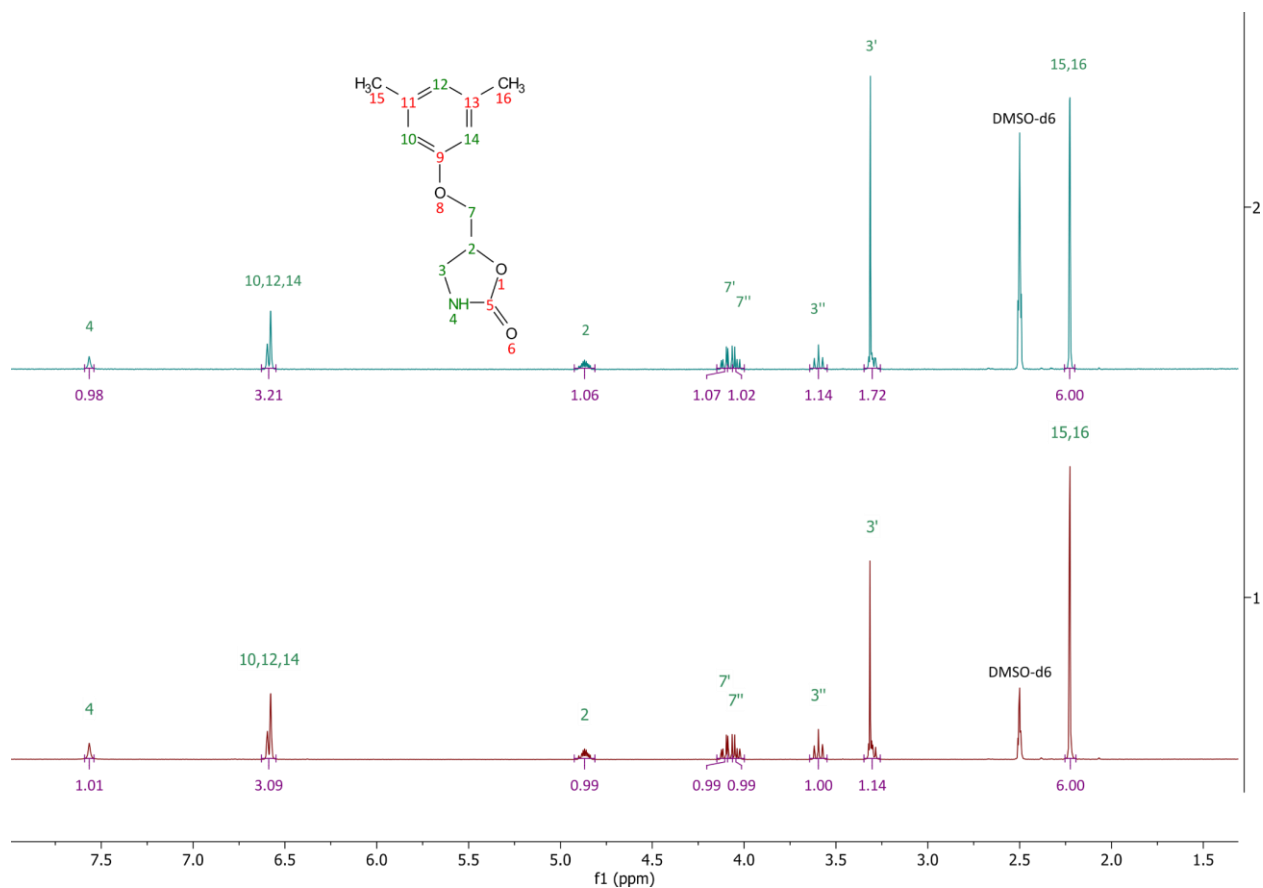

**Figure S2.** NMR data of metaxalone (1) Form A-rac and (2) Form A-R/S in DMSO-d (peak at 2.5 ppm), crystallized from volatile deep eutectic solvent crystallization with phenol. In pattern 2 the unexpected integration is likely due to the presence of a water peak integrated into the peak at 3.33 ppm from moisture in the solvent.

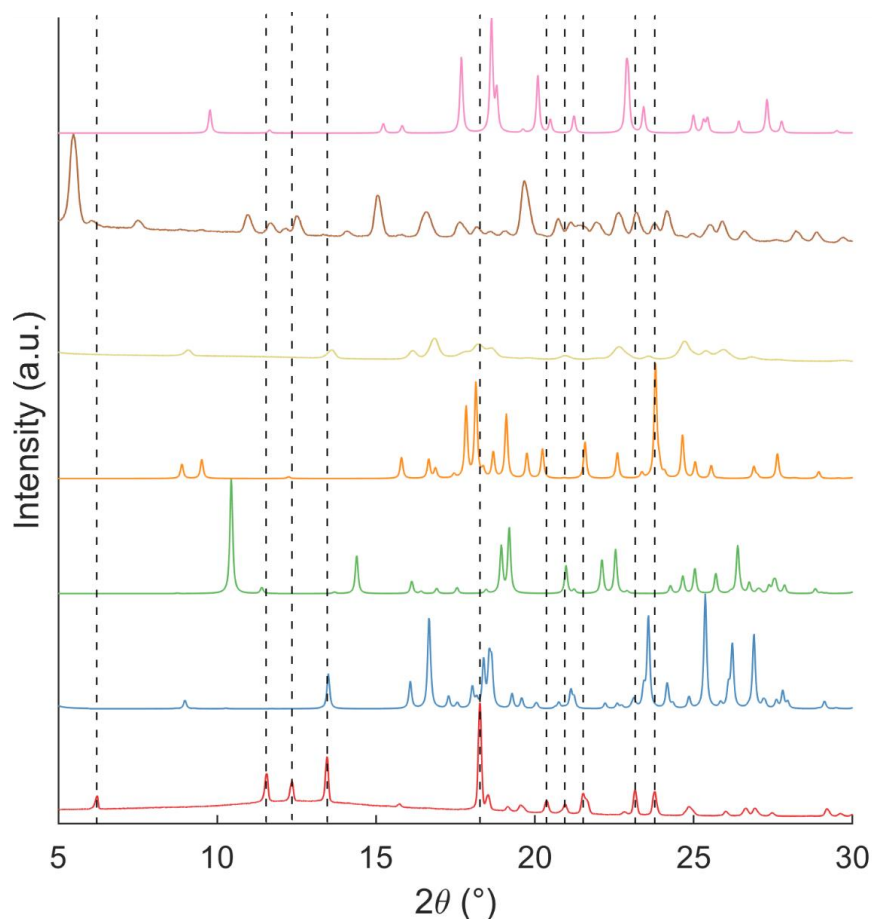

**Figure S3.** Powder X-ray diffraction pattern of an unknown metaxalone-phenol solvate (red), raw data with background not removed, with major peaks extended as dashed lines, compared to the powder patterns of Form A-rac (blue), Form B (green), Form A-S (orange), Form C-rac (yellow), Form C-S (brown) metaxalone and phenol (pink). Respective CCDC identifiers for Forms A-rac, B-rac and A-S: AXOGAW, AXOGAW01 and WISNEU, for phenol: PHENOL01.

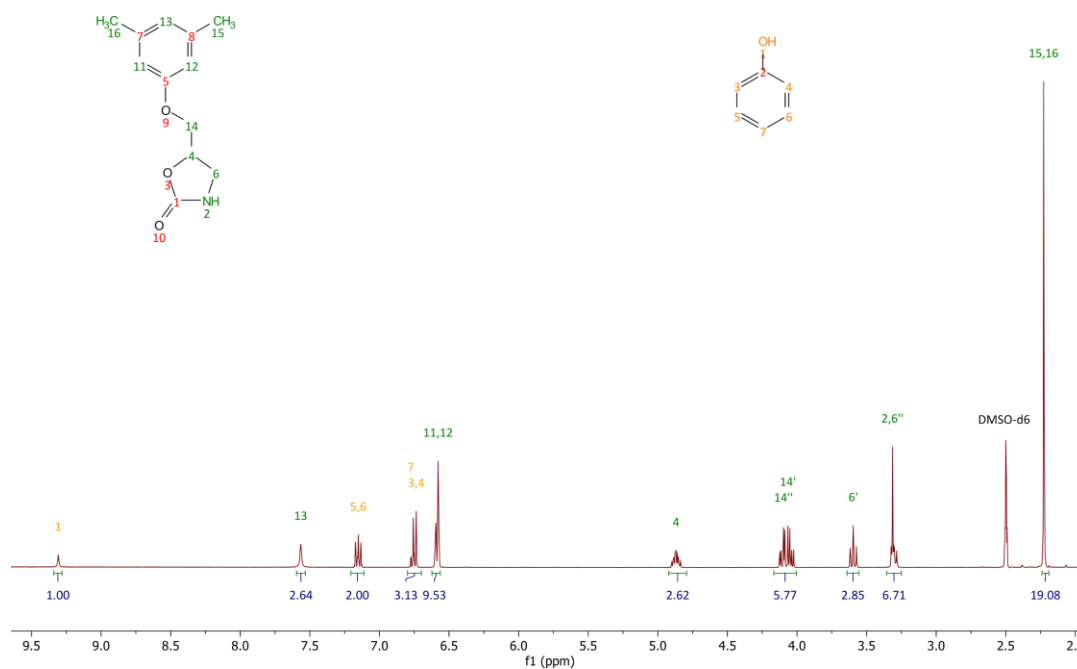

**Figure S4.** NMR data of a metaxalone-phenol solvate, crystallized from a ratio of 3:1 (phenol:metaxalone) volatile deep eutectic solvent, in DMSO-d (peak at 2.5 ppm).

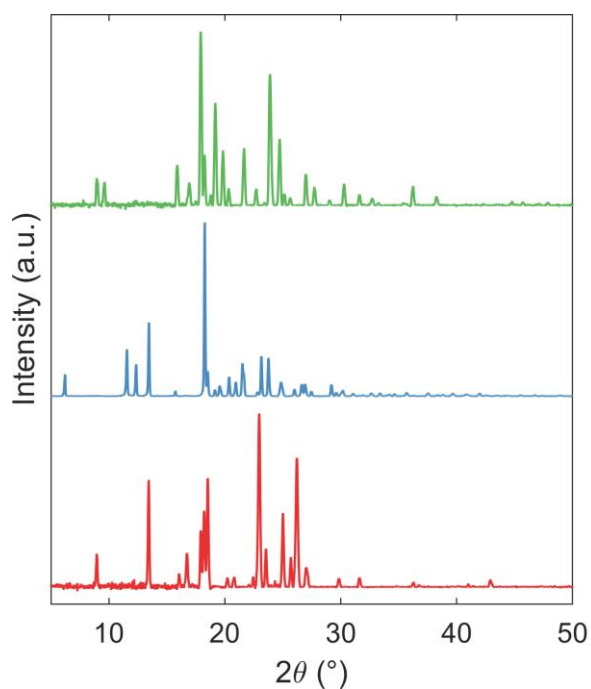

**Figure S5.** Powder X-ray diffraction patterns of metaxalone Form A-rac (red), an unknown MTX-phenol solvate (blue) and Form A-R/S (green), from 5° – 50°. All reflections for Form A-rac and A-R/S can be indexed to known forms Form A-rac and A-S with respective CCDC identifiers: AXOGAW and WISNEU.
